# Supplementary material
Source: PubMed Central journal article supplement (PMC5400845)

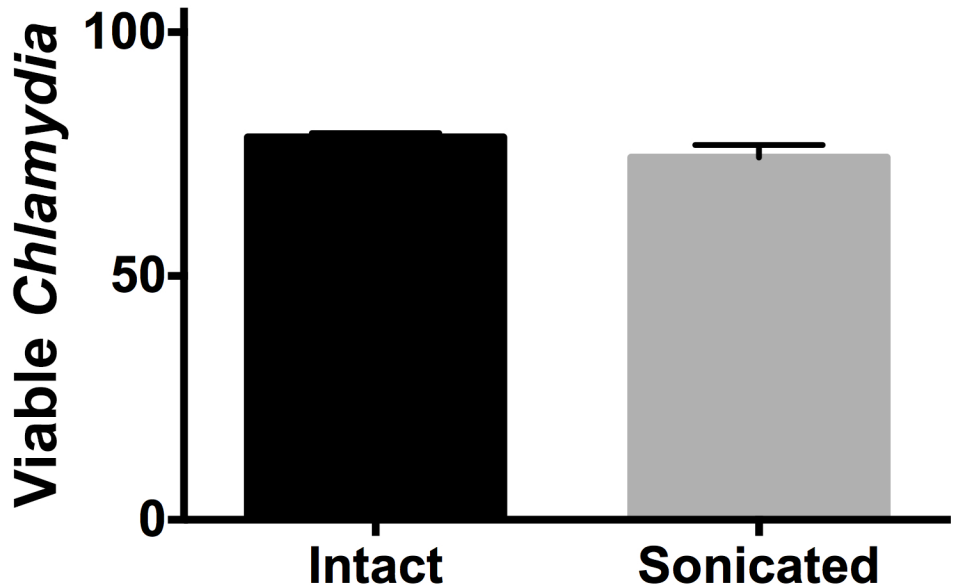

Supplement: IAI.00046-17_zii999092021s1.pdf [file IAI.00046-17_zii999092021s1.pdf]

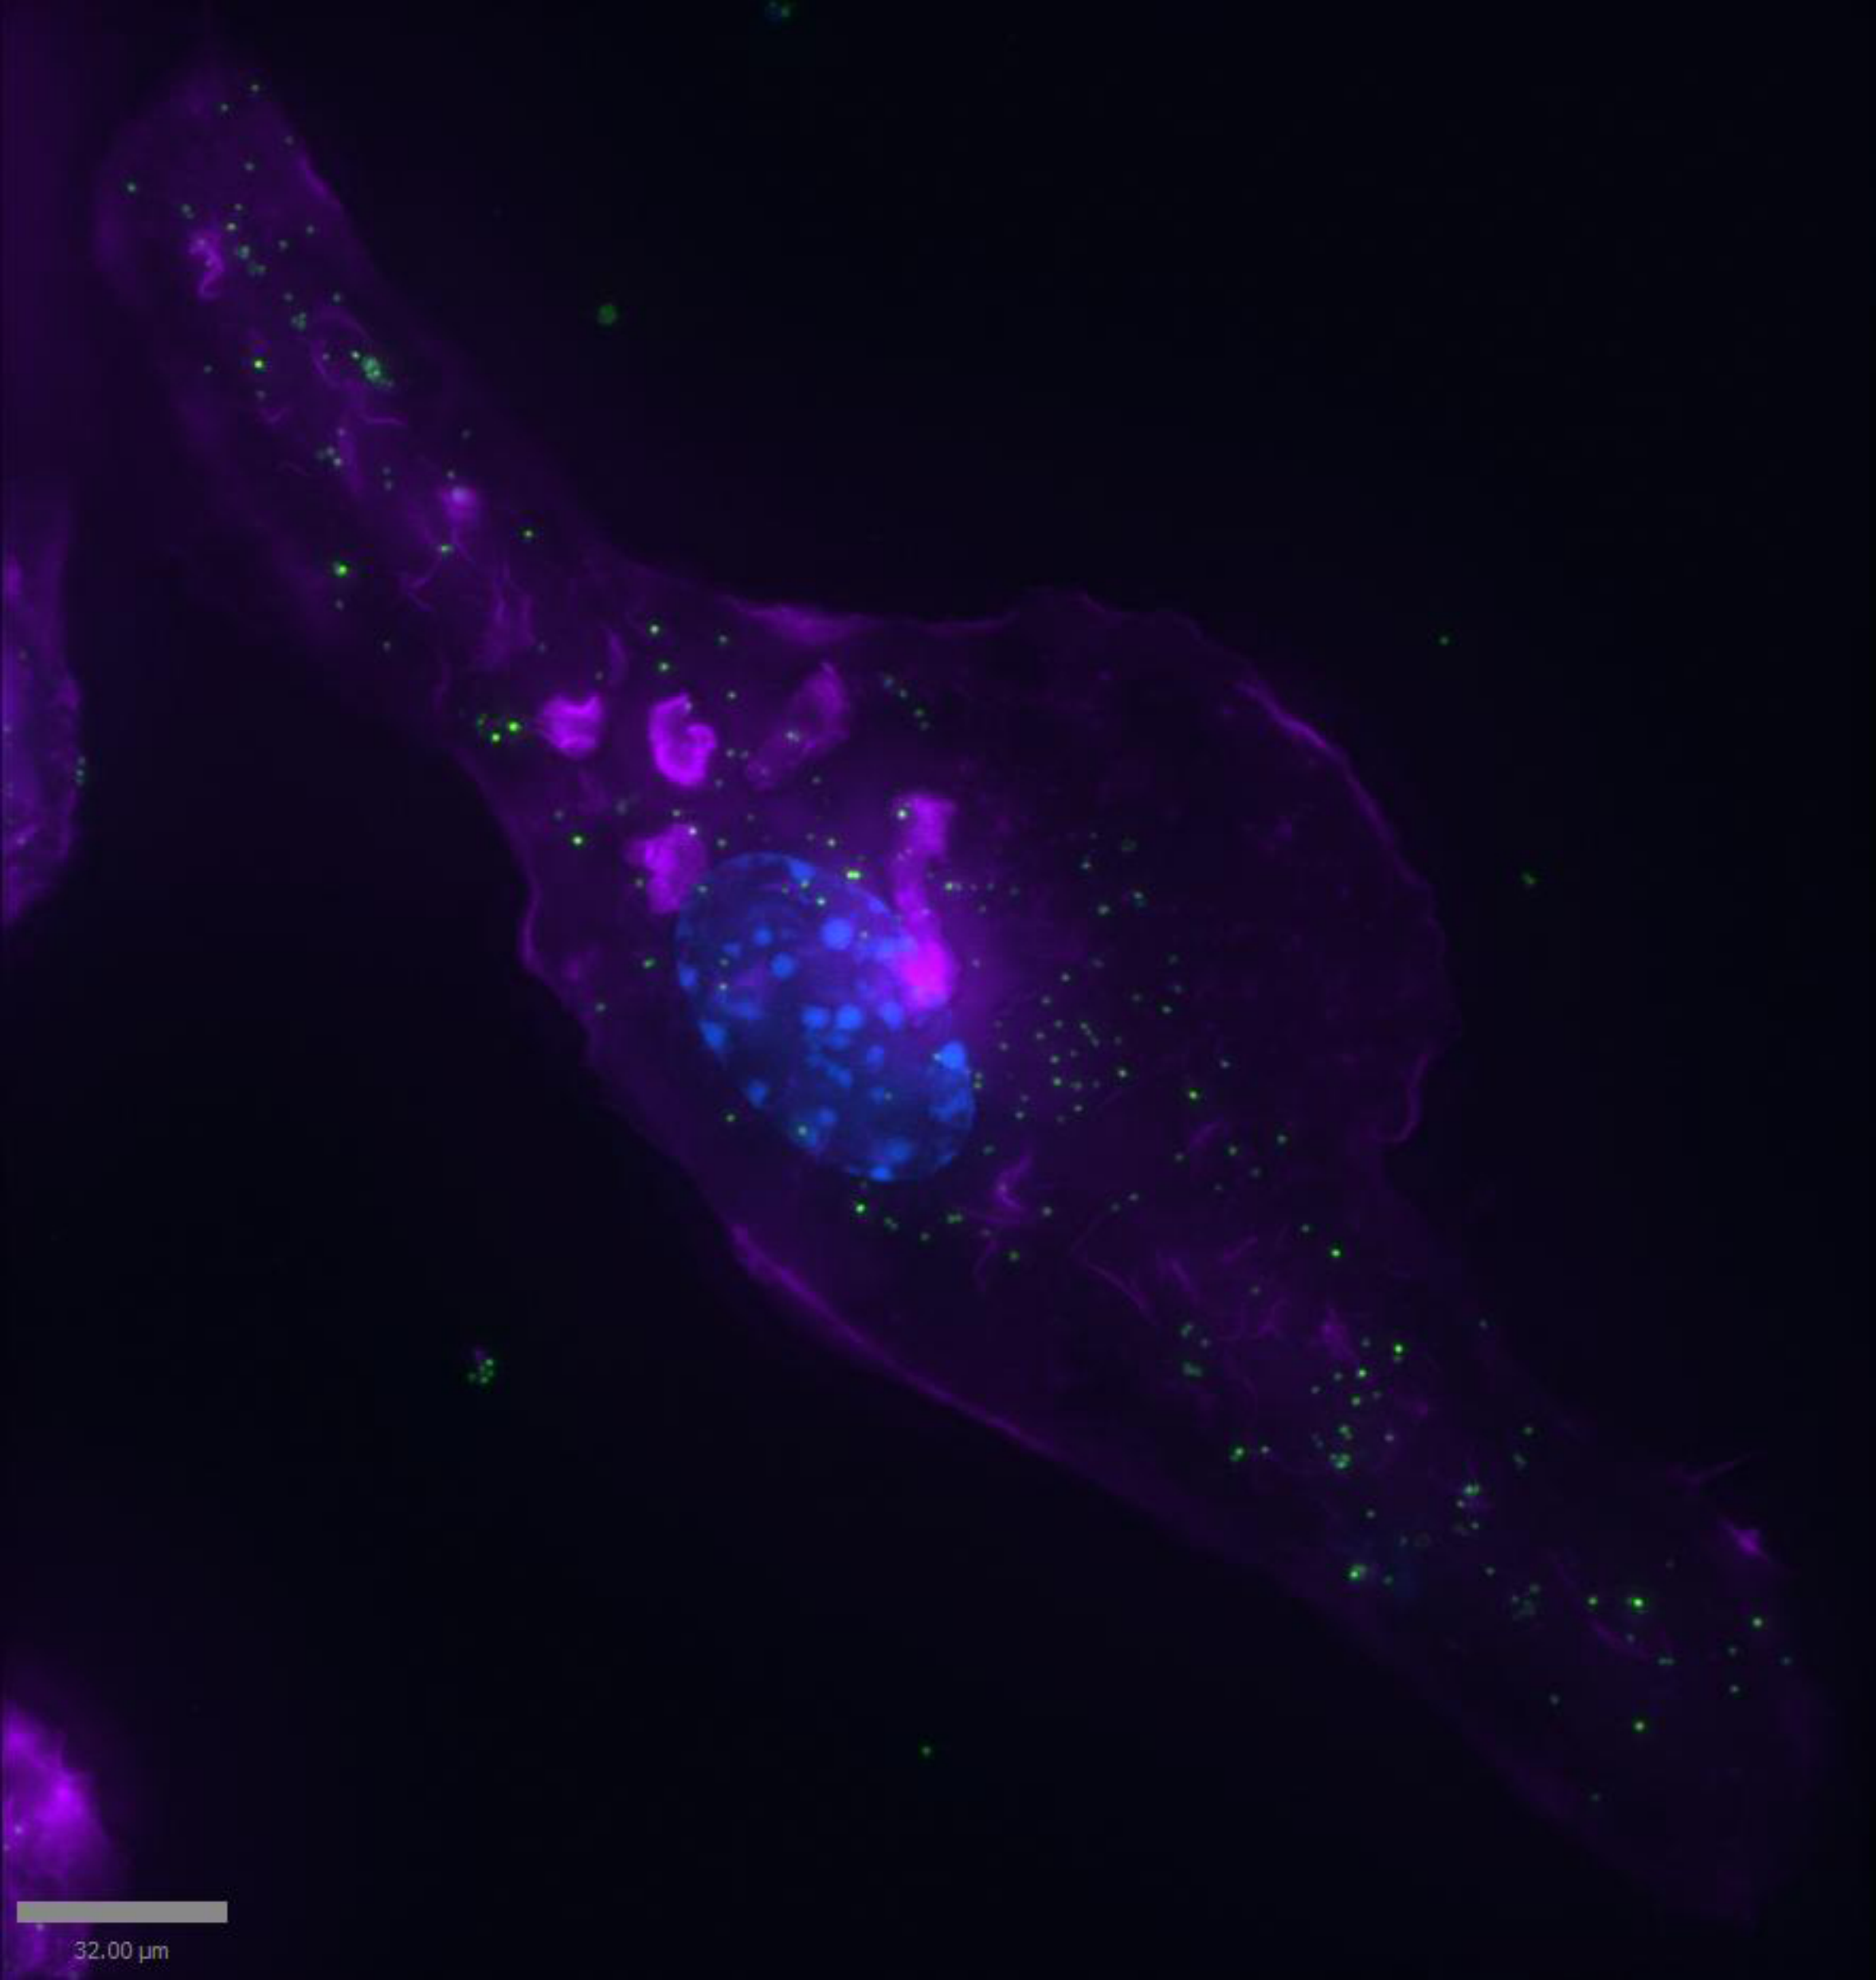

32.00 μm

Supplement: IAI.00046-17_zii999092021s2.pdf [file IAI.00046-17_zii999092021s2.pdf]

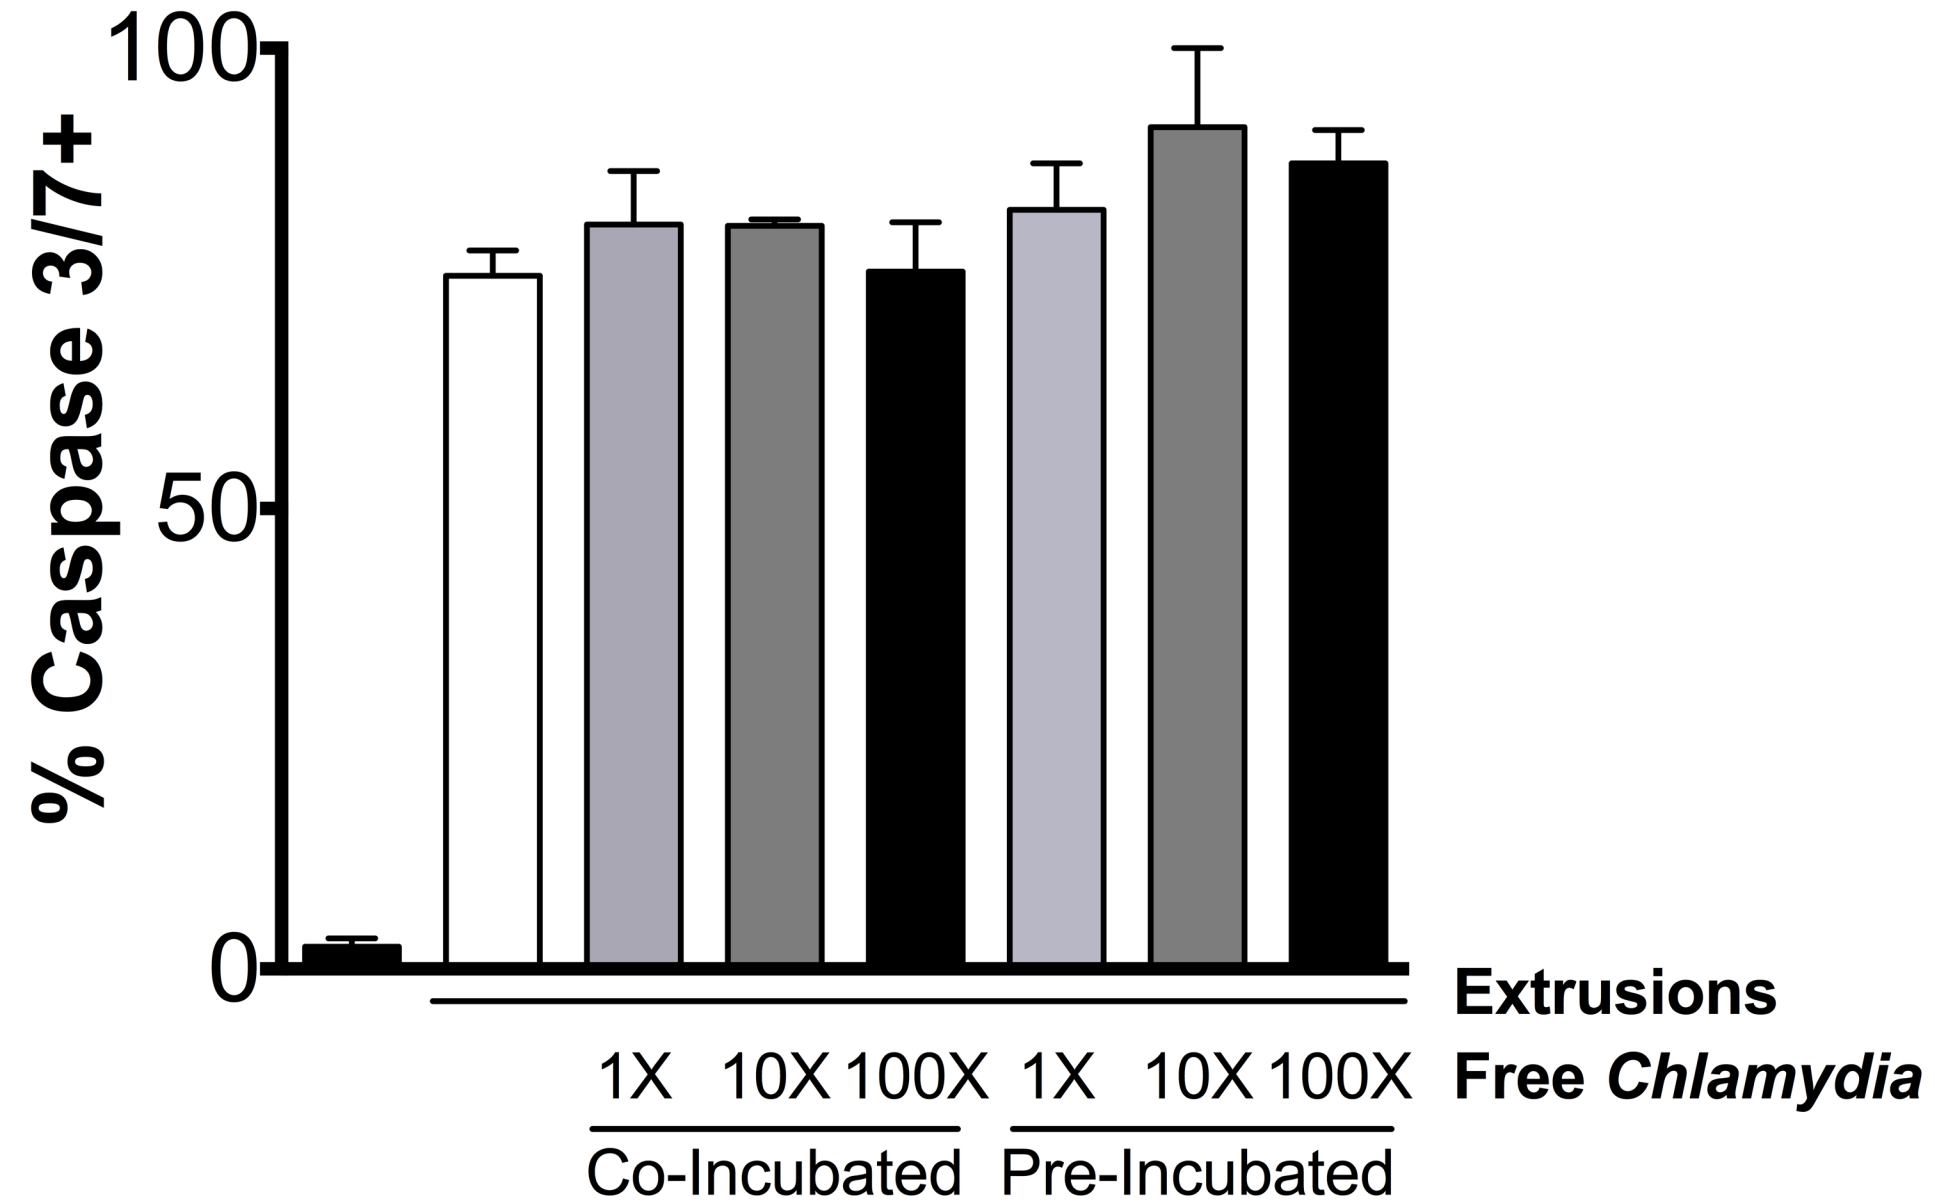

Supplement: IAI.00046-17_zii999092021s3.pdf [file IAI.00046-17_zii999092021s3.pdf]
